# Supplementary material for: A Chlorfenapyr Mixture Net Interceptor® G2 Shows High Efficacy and Wash Durability against Resistant Mosquitoes in West Africa
Source: PLoS One. 2016 Nov 16;11(11):e0165925. doi: 10.1371/journal.pone.0165925 (PMC5112870; doi:10.1371/journal.pone.0165925)
Supplement: S1 Table — (XLSX) [file pone.0165925.s001.xlsx]

## Sheet: Overall data
Week	day	hut	treat	sleeper	vrexufl	vrexbfl	vrexufd	vrexbfd	roomufl	roombfl	roomufd	roombfd	netufl	netbfl	netufd	netbfd	immdead	unflive	unfdead	bflive	bfdead	totunf	totblf	totlive	totdead	totexop	totnet	total	one	blfed	dead	exophil	net
1	1	1	0	0	3	0	0	0	0	0	0	0	0	2	0	0	0	3	0	2	0	3	2	5	0	3	2	5	1	40	0	60	40
1	2	1	0	0	1	1	0	0	1	0	2	0	0	1	0	0	2	2	2	2	0	4	2	4	2	2	1	6	1	33.3333	33.3333	33.3333	16.6667
1	3	1	0	0	2	1	0	0	1	0	2	0	0	2	0	0	2	3	2	3	0	5	3	6	2	3	2	8	1	37.5	25	37.5	25
1	4	1	0	0	0	2	0	0	0	1	1	0	0	2	0	0	0	0	1	5	0	1	5	5	1	2	2	6	1	83.3333	16.6667	33.3333	33.3333
1	5	1	0	0	2	0	0	0	1	0	0	0	0	0	0	0	0	3	0	0	0	3	0	3	0	2	0	3	1	0	0	66.6667	0
1	6	1	0	0	2	0	0	0	1	0	0	0	0	1	0	0	0	3	0	1	0	3	1	4	0	2	1	4	1	25	0	50	25
2	7	2	0	0	0	0	0	0	1	0	0	0	0	0	0	0	0	1	0	0	0	1	0	1	0	0	0	1	1	0	0	0	0
2	8	2	0	0	0	0	0	0	2	0	0	0	0	1	0	0	0	2	0	1	0	2	1	3	0	0	1	3	1	33.3333	0	0	33.3333
2	9	2	0	0	1	3	0	0	1	0	0	0	0	2	0	0	0	2	0	5	0	2	5	7	0	4	2	7	1	71.4286	0	57.1429	28.5714
2	10	2	0	0	0	2	0	0	0	0	0	0	0	1	0	0	0	0	0	3	0	0	3	3	0	2	1	3	1	100	0	66.6667	33.3333
2	11	2	0	0	0	1	0	0	1	2	0	0	1	3	0	0	0	2	0	6	0	2	6	8	0	1	4	8	1	75	0	12.5	50
2	12	2	0	0	2	8	1	0	1	4	0	0	0	6	0	0	1	3	1	18	0	4	18	21	1	11	6	22	1	81.8182	4.54545	50	27.2727
3	13	3	0	0	0	2	0	1	0	1	0	0	0	2	0	0	1	0	0	5	1	0	6	5	1	3	2	6	1	100	16.6667	50	33.3333
3	14	3	0	0	15	0	0	0	27	0	2	0	0	11	1	0	1	42	3	11	0	45	11	53	3	15	12	56	1	19.6429	5.35714	26.7857	21.4286
3	15	3	0	0	2	6	1	0	1	1	2	0	0	3	0	0	1	3	3	10	0	6	10	13	3	9	3	16	1	62.5	18.75	56.25	18.75
3	16	3	0	0	0	1	0	0	0	0	0	0	1	1	0	0	0	1	0	2	0	1	2	3	0	1	2	3	1	66.6667	0	33.3333	66.6667
3	17	3	0	0	1	0	0	0	0	0	0	0	0	1	0	0	0	1	0	1	0	1	1	2	0	1	1	2	1	50	0	50	50
3	18	3	0	0	5	0	1	0	0	0	0	0	0	1	0	0	1	5	1	1	0	6	1	6	1	6	1	7	1	14.2857	14.2857	85.7143	14.2857
4	19	4	0	0	0	0	0	0	0	0	0	0	0	5	0	0	0	0	0	5	0	0	5	5	0	0	5	5	1	100	0	0	100
4	20	4	0	0	1	0	0	0	1	1	0	0	0	3	0	0	0	2	0	4	0	2	4	6	0	1	3	6	1	66.6667	0	16.6667	50
4	21	4	0	0	0	0	0	0	0	0	0	0	0	1	0	0	0	0	0	1	0	0	1	1	0	0	1	1	1	100	0	0	100
4	22	4	0	0	1	0	0	0	1	0	0	0	0	6	0	0	0	2	0	6	0	2	6	8	0	1	6	8	1	75	0	12.5	75
4	23	4	0	0	7	3	0	0	2	2	0	0	0	0	0	0	0	9	0	5	0	9	5	14	0	10	0	14	1	35.7143	0	71.4286	0
4	24	4	0	0	0	1	1	0	9	5	0	0	0	10	0	0	0	9	1	16	0	10	16	25	1	2	10	26	1	61.5385	3.84615	7.69231	38.4615
5	25	5	0	0	0	0	1	0	1	0	0	0	0	4	0	0	1	1	1	4	0	2	4	5	1	1	4	6	1	66.6667	16.6667	16.6667	66.6667
5	26	5	0	0	0	0	0	0	0	0	0	0	0	4	0	0	0	0	0	4	0	0	4	4	0	0	4	4	1	100	0	0	100
5	27	5	0	0	0	1	0	0	0	6	0	0	0	0	0	0	0	0	0	7	0	0	7	7	0	1	0	7	1	100	0	14.2857	0
5	28	5	0	0	1	0	0	0	0	0	0	0	0	2	0	0	0	1	0	2	0	1	2	3	0	1	2	3	1	66.6667	0	33.3333	66.6667
5	29	5	0	0	1	0	0	0	1	0	0	0	0	2	0	0	0	2	0	2	0	2	2	4	0	1	2	4	1	50	0	25	50
5	30	5	0	0	0	0	1	0	0	0	0	0	0	3	0	0	1	0	1	3	0	1	3	3	1	1	3	4	1	75	25	25	75
6	31	6	0	0	4	0	0	0	0	1	0	0	0	3	0	0	0	4	0	4	0	4	4	8	0	4	3	8	1	50	0	50	37.5
6	32	6	0	0	0	2	0	0	0	0	1	0	0	1	0	0	1	0	1	3	0	1	3	3	1	2	1	4	1	75	25	50	25
6	33	6	0	0	0	0	0	0	5	3	1	0	0	8	0	0	1	5	1	11	0	6	11	16	1	0	8	17	1	64.7059	5.88235	0	47.0588
6	34	6	0	0	1	1	0	0	0	0	0	0	0	0	0	0	0	1	0	1	0	1	1	2	0	2	0	2	1	50	0	100	0
6	35	6	0	0	2	1	0	0	1	1	1	0	1	2	0	0	1	4	1	4	0	5	4	8	1	3	3	9	1	44.4444	11.1111	33.3333	33.3333
6	36	6	0	0	1	5	0	0	0	1	0	0	0	2	0	0	0	1	0	8	0	1	8	9	0	6	2	9	1	88.8889	0	66.6667	22.2222
7	37	7	0	0	0	1	0	0	0	0	0	0	0	3	0	0	0	0	0	4	0	0	4	4	0	1	3	4	1	100	0	25	75
7	38	7	0	0	2	0	1	0	1	1	0	0	0	1	0	0	0	3	1	2	0	4	2	5	1	3	1	6	1	33.3333	16.6667	50	16.6667
7	39	7	0	0	5	2	1	0	3	0	1	0	1	2	0	0	1	9	2	4	0	11	4	13	2	8	3	15	1	26.6667	13.3333	53.3333	20
7	40	7	0	0	1	0	0	0	0	1	0	0	0	1	0	0	0	1	0	2	0	1	2	3	0	1	1	3	1	66.6667	0	33.3333	33.3333
7	41	7	0	0	1	0	0	0	1	0	0	0	0	2	0	0	0	2	0	2	0	2	2	4	0	1	2	4	1	50	0	25	50
7	42	7	0	0	3	0	0	0	0	0	0	0	0	4	0	0	0	3	0	4	0	3	4	7	0	3	4	7	1	57.1429	0	42.8571	57.1429
8	43	8	0	0	2	0	0	0	0	0	0	0	0	2	0	0	0	2	0	2	0	2	2	4	0	2	2	4	1	50	0	50	50
8	44	8	0	0	0	0	0	0	1	0	0	0	0	0	0	0	0	1	0	0	0	1	0	1	0	0	0	1	1	0	0	0	0
8	45	8	0	0	0	1	0	0	3	3	0	0	0	5	0	0	0	3	0	9	0	3	9	12	0	1	5	12	1	75	0	8.33333	41.6667
8	46	8	0	0	1	4	0	0	1	1	0	0	0	3	0	0	0	2	0	8	0	2	8	10	0	5	3	10	1	80	0	50	30
8	47	8	0	0	1	0	0	0	2	0	0	0	1	4	0	0	0	4	0	4	0	4	4	8	0	1	5	8	1	50	0	12.5	62.5
8	48	8	0	0	0	0	0	0	1	2	2	0	0	2	0	0	1	1	2	4	0	3	4	5	2	0	2	7	1	57.1429	28.5714	0	28.5714
9	49	9	0	0	1	0	0	0	2	3	0	0	0	1	0	0	0	3	0	4	0	3	4	7	0	1	1	7	1	57.1429	0	14.2857	14.2857
9	50	9	0	0	1	0	0	0	0	1	0	0	0	4	0	0	0	1	0	5	0	1	5	6	0	1	4	6	1	83.3333	0	16.6667	66.6667
9	51	9	0	0	0	2	1	0	0	1	0	0	0	6	0	0	1	0	1	9	0	1	9	9	1	3	6	10	1	90	10	30	60
9	52	9	0	0	0	0	0	0	0	0	0	0	2	2	0	0	0	2	0	2	0	2	2	4	0	0	4	4	1	50	0	0	100
9	53	9	0	0	2	1	0	0	2	0	0	0	0	3	0	0	0	4	0	4	0	4	4	8	0	3	3	8	1	50	0	37.5	37.5
9	54	9	0	0	2	0	0	0	1	0	0	0	1	3	0	0	0	4	0	3	0	4	3	7	0	2	4	7	1	42.8571	0	28.5714	57.1429
10	55	10	0	0	1	0	0	0	0	0	0	0	0	1	0	0	0	1	0	1	0	1	1	2	0	1	1	2	1	50	0	50	50
10	56	10	0	0	0	2	0	0	2	0	0	0	0	5	0	0	0	2	0	7	0	2	7	9	0	2	5	9	1	77.7778	0	22.2222	55.5556
10	57	10	0	0	0	0	0	0	0	0	0	0	0	1	0	0	0	0	0	1	0	0	1	1	0	0	1	1	1	100	0	0	100
10	58	10	0	0	0	0	0	0	1	0	0	0	0	2	0	0	0	1	0	2	0	1	2	3	0	0	2	3	1	66.6667	0	0	66.6667
10	59	10	0	0	2	2	0	0	1	0	0	0	0	5	0	0	0	3	0	7	0	3	7	10	0	4	5	10	1	70	0	40	50
10	60	10	0	0	1	2	0	0	0	0	0	0	0	5	0	0	0	1	0	7	0	1	7	8	0	3	5	8	1	87.5	0	37.5	62.5
11	61	11	0	0	0	2	0	0	0	1	0	0	0	0	0	0	0	0	0	3	0	0	3	3	0	2	0	3	1	100	0	66.6667	0
11	62	11	0	0	0	0	0	0	5	0	0	0	0	11	0	0	0	5	0	11	0	5	11	16	0	0	11	16	1	68.75	0	0	68.75
11	63	11	0	0	4	0	2	0	1	0	0	0	1	6	0	0	0	6	2	6	0	8	6	12	2	6	7	14	1	42.8571	14.2857	42.8571	50
11	64	11	0	0	2	2	0	0	2	0	0	0	0	7	0	0	0	4	0	9	0	4	9	13	0	4	7	13	1	69.2308	0	30.7692	53.8462
11	65	11	0	0	8	4	1	0	1	0	0	0	1	7	0	0	1	10	1	11	0	11	11	21	1	13	8	22	1	50	4.54545	59.0909	36.3636
11	66	11	0	0	0	1	0	0	0	0	0	0	0	2	0	0	0	0	0	3	0	0	3	3	0	1	2	3	1	100	0	33.3333	66.6667
12	67	1	0	0	3	1	0	0	1	4	0	0	0	3	0	0	0	4	0	8	0	4	8	12	0	4	3	12	1	66.6667	0	33.3333	25
12	68	1	0	0	1	0	0	0	1	1	0	0	0	6	0	0	0	2	0	7	0	2	7	9	0	1	6	9	1	77.7778	0	11.1111	66.6667
12	69	1	0	0	0	0	0	0	0	1	0	0	0	3	0	0	0	0	0	4	0	0	4	4	0	0	3	4	1	100	0	0	75
12	70	1	0	0	0	0	0	0	6	0	0	0	0	9	0	0	0	6	0	9	0	6	9	15	0	0	9	15	1	60	0	0	60
12	71	1	0	0	1	0	0	0	0	0	0	0	0	8	0	0	0	1	0	8	0	1	8	9	0	1	8	9	1	88.8889	0	11.1111	88.8889
12	72	1	0	0	4	2	1	0	8	4	0	0	1	9	0	0	0	13	1	15	0	14	15	28	1	7	10	29	1	51.7241	3.44828	24.1379	34.4828
12	73	1	0	0	16	8	1	0	9	9	1	0	1	20	0	0	0	26	2	37	0	28	37	63	2	25	21	65	1	56.9231	3.07692	38.4615	32.3077
1	3	2	1	0	0	0	5	0	0	0	1	0	0	1	0	0	6	0	6	1	0	6	1	1	6	5	1	7	1	14.2857	85.7143	71.4286	14.2857
1	4	2	1	0	0	0	1	0	0	0	1	0	0	1	0	1	1	0	2	1	1	2	2	1	3	1	2	4	1	50	75	25	50
1	5	2	1	0	1	0	0	0	1	1	0	0	0	0	0	0	0	2	0	1	0	2	1	3	0	1	0	3	1	33.3333	0	33.3333	0
1	6	2	1	0	1	1	1	0	1	0	1	0	0	0	0	0	0	2	2	1	0	4	1	3	2	3	0	5	1	20	40	60	0
2	7	3	1	0	0	2	0	0	0	0	0	0	0	0	0	0	0	0	0	2	0	0	2	2	0	2	0	2	1	100	0	100	0
2	8	3	1	0	0	1	3	0	0	0	1	0	0	0	0	0	2	0	4	1	0	4	1	1	4	4	0	5	1	20	80	80	0
2	9	3	1	0	0	0	0	0	0	0	1	0	0	0	0	0	0	0	1	0	0	1	0	0	1	0	0	1	1	0	100	0	0
2	10	3	1	0	0	0	2	0	0	0	0	0	0	0	0	0	2	0	2	0	0	2	0	0	2	2	0	2	1	0	100	100	0
2	11	3	1	0	0	0	0	0	0	0	0	0	0	0	0	1	1	0	0	0	1	0	1	0	1	0	1	1	1	100	100	0	100
2	12	3	1	0	0	0	3	0	0	0	0	0	0	0	0	1	2	0	3	0	1	3	1	0	4	3	1	4	1	25	100	75	25
3	13	4	1	0	2	8	3	1	2	1	1	0	0	0	0	7	3	4	4	9	8	8	17	13	12	14	7	25	1	68	48	56	28
3	14	4	1	0	0	4	14	0	4	3	8	0	0	1	0	2	11	4	22	8	2	26	10	12	24	18	3	36	1	27.7778	66.6667	50	8.33333
3	15	4	1	0	1	0	1	0	0	0	0	1	0	0	0	2	2	1	1	0	3	2	3	1	4	2	2	5	1	60	80	40	40
3	16	4	1	0	1	1	1	1	0	1	2	0	0	1	0	0	2	1	3	3	1	4	4	4	4	4	1	8	1	50	50	50	12.5
3	17	4	1	0	3	0	5	0	0	1	2	0	0	0	0	0	4	3	7	1	0	10	1	4	7	8	0	11	1	9.09091	63.6364	72.7273	0
3	18	4	1	0	1	0	1	1	0	0	0	0	0	0	0	0	1	1	1	0	1	2	1	1	2	3	0	3	1	33.3333	66.6667	100	0
4	19	5	1	0	0	2	0	0	0	0	0	0	0	0	0	0	0	0	0	2	0	0	2	2	0	2	0	2	1	100	0	100	0
4	20	5	1	0	0	0	1	1	0	0	0	0	0	0	0	2	2	0	1	0	3	1	3	0	4	2	2	4	1	75	100	50	50
4	21	5	1	0	1	0	0	0	0	0	0	0	0	0	0	2	0	1	0	0	2	1	2	1	2	1	2	3	1	66.6667	66.6667	33.3333	66.6667
4	22	5	1	0	0	0	1	0	0	0	0	0	0	2	0	1	1	0	1	2	1	1	3	2	2	1	3	4	1	75	50	25	75
4	23	5	1	0	1	2	1	0	0	1	1	0	0	0	0	0	0	1	2	3	0	3	3	4	2	4	0	6	1	50	33.3333	66.6667	0
4	24	5	1	0	1	0	1	0	2	0	2	0	0	1	0	2	2	3	3	1	2	6	3	4	5	2	3	9	1	33.3333	55.5556	22.2222	33.3333
5	25	6	1	0	1	1	10	0	0	0	1	1	0	0	0	1	10	1	11	1	2	12	3	2	13	12	1	15	1	20	86.6667	80	6.66667
5	26	6	1	0	2	0	7	0	0	0	1	0	0	3	1	1	6	2	9	3	1	11	4	5	10	9	5	15	1	26.6667	66.6667	60	33.3333
5	27	6	1	0	1	3	7	0	4	0	7	0	0	0	0	0	11	5	14	3	0	19	3	8	14	11	0	22	1	13.6364	63.6364	50	0
5	28	6	1	0	1	2	5	0	0	1	1	0	0	0	0	0	6	1	6	3	0	7	3	4	6	8	0	10	1	30	60	80	0
5	29	6	1	0	0	0	6	0	1	0	6	0	0	0	0	0	10	1	12	0	0	13	0	1	12	6	0	13	1	0	92.3077	46.1538	0
5	30	6	1	0	1	1	5	1	0	0	1	0	0	1	1	0	7	1	7	2	1	8	3	3	8	8	2	11	1	27.2727	72.7273	72.7273	18.1818
6	31	7	1	0	3	1	3	0	0	0	4	0	1	1	0	0	3	4	7	2	0	11	2	6	7	7	2	13	1	15.3846	53.8462	53.8462	15.3846
6	32	7	1	0	0	0	7	1	0	0	1	0	0	0	0	2	5	0	8	0	3	8	3	0	11	8	2	11	1	27.2727	100	72.7273	18.1818
6	33	7	1	0	1	0	2	0	0	0	0	0	0	0	0	0	1	1	2	0	0	3	0	1	2	3	0	3	1	0	66.6667	100	0
6	34	7	1	0	0	0	1	0	0	0	2	0	0	0	0	0	2	0	3	0	0	3	0	0	3	1	0	3	1	0	100	33.3333	0
6	35	7	1	0	1	0	4	0	0	0	0	0	0	0	0	0	2	1	4	0	0	5	0	1	4	5	0	5	1	0	80	100	0
6	36	7	1	0	0	0	1	0	0	0	1	0	0	0	0	0	1	0	2	0	0	2	0	0	2	1	0	2	1	0	100	50	0
7	37	8	1	0	0	0	1	1	0	0	1	0	0	0	0	0	2	0	2	0	1	2	1	0	3	2	0	3	1	33.3333	100	66.6667	0
7	38	8	1	0	1	0	5	0	0	0	1	2	0	1	0	1	6	1	6	1	3	7	4	2	9	6	2	11	1	36.3636	81.8182	54.5455	18.1818
7	39	8	1	0	4	1	2	0	1	1	2	0	0	2	0	2	4	5	4	4	2	9	6	9	6	7	4	15	1	40	40	46.6667	26.6667
7	40	8	1	0	1	0	4	1	0	1	2	0	0	1	0	4	6	1	6	2	5	7	7	3	11	6	5	14	1	50	78.5714	42.8571	35.7143
7	41	8	1	0	0	0	3	0	0	0	0	0	0	0	0	0	3	0	3	0	0	3	0	0	3	3	0	3	1	0	100	100	0
7	42	8	1	0	1	0	6	0	0	0	0	0	0	0	0	0	3	1	6	0	0	7	0	1	6	7	0	7	1	0	85.7143	100	0
8	43	9	1	0	1	0	0	0	0	0	0	0	0	0	0	1	1	1	0	0	1	1	1	1	1	1	1	2	1	50	50	50	50
8	44	9	1	0	0	0	1	1	0	0	1	0	0	2	0	1	1	0	2	2	2	2	4	2	4	2	3	6	1	66.6667	66.6667	33.3333	50
8	45	9	1	0	0	0	0	0	1	1	0	0	0	0	0	0	0	1	0	1	0	1	1	2	0	0	0	2	1	50	0	0	0
8	46	9	1	0	0	0	0	0	0	0	1	0	0	0	0	1	2	0	1	0	1	1	1	0	2	0	1	2	1	50	100	0	50
8	47	9	1	0	1	0	1	0	0	0	0	0	0	0	0	0	1	1	1	0	0	2	0	1	1	2	0	2	1	0	50	100	0
8	48	9	1	0	0	0	0	0	0	1	0	0	0	1	0	1	0	0	0	2	1	0	3	2	1	0	2	3	1	100	33.3333	0	66.6667
9	49	10	1	0	2	2	11	0	0	0	3	0	0	0	0	1	12	2	14	2	1	16	3	4	15	15	1	19	1	15.7895	78.9474	78.9474	5.26316
9	50	10	1	0	2	0	3	0	0	2	1	0	0	3	0	2	4	2	4	5	2	6	7	7	6	5	5	13	1	53.8462	46.1538	38.4615	38.4615
9	51	10	1	0	1	0	4	1	2	0	1	0	0	1	0	1	6	3	5	1	2	8	3	4	7	6	2	11	1	27.2727	63.6364	54.5455	18.1818
9	52	10	1	0	1	1	2	0	0	0	0	0	1	1	2	1	5	2	4	2	1	6	3	4	5	4	5	9	1	33.3333	55.5556	44.4444	55.5556
9	53	10	1	0	2	0	2	0	0	0	0	0	1	0	0	0	2	3	2	0	0	5	0	3	2	4	1	5	1	0	40	80	20
9	54	10	1	0	0	0	2	0	0	0	1	0	0	4	0	1	2	0	3	4	1	3	5	4	4	2	5	8	1	62.5	50	25	62.5
10	55	11	1	0	0	2	3	0	0	0	0	0	0	1	0	0	3	0	3	3	0	3	3	3	3	5	1	6	1	50	50	83.3333	16.6667
10	56	11	1	0	0	1	1	0	0	0	2	0	0	0	0	1	2	0	3	1	1	3	2	1	4	2	1	5	1	40	80	40	20
10	58	11	1	0	1	0	1	0	0	0	1	0	0	0	0	1	1	1	2	0	1	3	1	1	3	2	1	4	1	25	75	50	25
10	59	11	1	0	0	0	1	0	0	0	0	0	0	1	0	0	1	0	1	1	0	1	1	1	1	1	1	2	1	50	50	50	50
10	60	11	1	0	0	0	4	1	0	0	0	0	0	4	0	0	2	0	4	4	1	4	5	4	5	5	4	9	1	55.5556	55.5556	55.5556	44.4444
11	61	1	1	0	0	0	0	0	0	0	0	0	0	0	1	1	1	0	1	0	1	1	1	0	2	0	2	2	1	50	100	0	100
11	62	1	1	0	2	1	7	0	0	0	0	0	0	0	0	1	8	2	7	1	1	9	2	3	8	10	1	11	1	18.1818	72.7273	90.9091	9.09091
11	63	1	1	0	2	3	4	1	1	0	5	1	0	0	0	1	10	3	9	3	3	12	6	6	12	10	1	18	1	33.3333	66.6667	55.5556	5.55556
11	64	1	1	0	0	1	0	1	0	0	3	1	0	0	0	2	7	0	3	1	4	3	5	1	7	2	2	8	1	62.5	87.5	25	25
11	66	1	1	0	1	0	4	0	0	0	3	0	0	0	0	0	7	1	7	0	0	8	0	1	7	5	0	8	1	0	87.5	62.5	0
12	67	1	1	0	3	0	14	0	0	0	2	0	0	3	0	3	15	3	16	3	3	19	6	6	19	17	6	25	1	24	76	68	24
12	68	2	1	0	1	0	18	1	1	0	7	0	0	0	0	0	20	2	25	0	1	27	1	2	26	20	0	28	1	3.57143	92.8571	71.4286	0
12	69	2	1	0	1	0	8	0	0	0	9	0	0	0	0	2	11	1	17	0	2	18	2	1	19	9	2	20	1	10	95	45	10
12	70	2	1	0	0	0	4	0	0	0	0	0	0	0	0	2	3	0	4	0	2	4	2	0	6	4	2	6	1	33.3333	100	66.6667	33.3333
12	71	2	1	0	5	0	8	1	1	0	0	0	0	0	1	1	11	6	9	0	2	15	2	6	11	14	2	17	1	11.7647	64.7059	82.3529	11.7647
12	72	2	1	0	3	0	6	0	4	1	1	0	0	3	0	1	6	7	7	4	1	14	5	11	8	9	4	19	1	26.3158	42.1053	47.3684	21.0526
12	73	2	1	0	5	3	6	0	0	0	0	2	0	2	0	2	7	5	6	5	4	11	9	10	10	14	4	20	1	45	50	70	20
1	2	3	2	0	7	2	0	0	2	0	0	0	0	1	0	0	0	9	0	3	0	9	3	12	0	9	1	12	1	25	0	75	8.33333
1	3	3	2	0	0	0	0	0	0	0	0	0	0	2	0	0	0	0	0	2	0	0	2	2	0	0	2	2	1	100	0	0	100
1	4	3	2	0	0	0	0	0	0	0	0	0	0	1	0	0	0	0	0	1	0	0	1	1	0	0	1	1	1	100	0	0	100
1	5	3	2	0	0	1	0	0	0	0	0	0	0	0	0	0	0	0	0	1	0	0	1	1	0	1	0	1	1	100	0	100	0
1	6	3	2	0	0	0	0	0	1	0	0	0	0	0	0	0	0	1	0	0	0	1	0	1	0	0	0	1	1	0	0	0	0
2	7	4	2	0	2	0	0	0	0	1	0	0	0	0	0	1	0	2	0	1	1	2	2	3	1	2	1	4	1	50	25	50	25
2	8	4	2	0	4	0	1	0	6	0	1	0	0	0	0	0	2	10	2	0	0	12	0	10	2	5	0	12	1	0	16.6667	41.6667	0
2	9	4	2	0	7	0	0	0	1	1	0	0	0	0	0	0	0	8	0	1	0	8	1	9	0	7	0	9	1	11.1111	0	77.7778	0
2	10	4	2	0	2	0	1	0	1	0	0	0	1	1	0	0	1	4	1	1	0	5	1	5	1	3	2	6	1	16.6667	16.6667	50	33.3333
2	11	4	2	0	5	1	1	0	0	0	0	0	0	3	0	0	1	5	1	4	0	6	4	9	1	7	3	10	1	40	10	70	30
2	12	4	2	0	2	1	0	0	5	1	0	0	0	0	0	0	0	7	0	2	0	7	2	9	0	3	0	9	1	22.2222	0	33.3333	0
3	13	5	2	0	2	1	0	0	0	0	0	0	0	8	0	0	0	2	0	9	0	2	9	11	0	3	8	11	1	81.8182	0	27.2727	72.7273
3	14	5	2	0	5	0	0	0	8	0	0	0	0	4	0	0	0	13	0	4	0	13	4	17	0	5	4	17	1	23.5294	0	29.4118	23.5294
3	15	5	2	0	2	1	0	0	3	0	2	0	0	4	0	0	1	5	2	5	0	7	5	10	2	3	4	12	1	41.6667	16.6667	25	33.3333
3	16	5	2	0	1	0	1	0	3	0	0	0	1	10	0	0	1	5	1	10	0	6	10	15	1	2	11	16	1	62.5	6.25	12.5	68.75
3	17	5	2	0	7	0	1	0	3	0	1	0	0	2	0	0	1	10	2	2	0	12	2	12	2	8	2	14	1	14.2857	14.2857	57.1429	14.2857
4	19	6	2	0	4	1	2	0	4	0	0	0	0	2	0	0	2	8	2	3	0	10	3	11	2	7	2	13	1	23.0769	15.3846	53.8462	15.3846
4	20	6	2	0	32	3	3	0	5	1	0	0	1	7	0	1	2	38	3	11	1	41	12	49	4	38	9	53	1	22.6415	7.54717	71.6981	16.9811
4	21	6	2	0	12	0	3	0	4	0	3	0	0	2	0	0	2	16	6	2	0	22	2	18	6	15	2	24	1	8.33333	25	62.5	8.33333
4	22	6	2	0	4	0	0	0	3	0	0	0	1	1	1	0	1	8	1	1	0	9	1	9	1	4	3	10	1	10	10	40	30
4	23	6	2	0	8	0	0	0	1	0	0	0	3	0	0	0	0	12	0	0	0	12	0	12	0	8	3	12	1	0	0	66.6667	25
4	24	6	2	0	5	1	1	0	0	0	3	0	0	0	0	0	3	5	4	1	0	9	1	6	4	7	0	10	1	10	40	70	0
5	25	7	2	0	0	1	0	0	0	0	0	0	0	0	0	0	0	0	0	1	0	0	1	1	0	1	0	1	1	100	0	100	0
5	26	7	2	0	8	3	0	0	2	1	1	0	0	4	0	0	0	10	1	8	0	11	8	18	1	11	4	19	1	42.1053	5.26316	57.8947	21.0526
5	27	7	2	0	2	0	0	0	1	0	0	0	0	1	0	0	0	3	0	1	0	3	1	4	0	2	1	4	1	25	0	50	25
5	28	7	2	0	13	0	4	0	5	1	0	0	0	2	0	0	4	18	4	3	0	22	3	21	4	17	2	25	1	12	16	68	8
5	29	7	2	0	5	0	5	0	3	2	2	0	0	4	0	0	5	8	7	6	0	15	6	14	7	10	4	21	1	28.5714	33.3333	47.619	19.0476
5	30	7	2	0	4	2	2	0	0	0	0	0	0	0	0	0	2	4	2	2	0	6	2	6	2	8	0	8	1	25	25	100	0
6	31	8	2	0	5	1	0	0	3	0	2	0	2	1	0	0	0	10	2	2	0	12	2	12	2	6	3	14	1	14.2857	14.2857	42.8571	21.4286
6	32	8	2	0	3	0	0	0	1	0	0	0	9	0	0	0	0	13	0	0	0	13	0	13	0	3	9	13	1	0	0	23.0769	69.2308
6	33	8	2	0	6	0	0	0	0	0	0	0	0	3	0	0	0	6	0	3	0	6	3	9	0	6	3	9	1	33.3333	0	66.6667	33.3333
6	34	8	2	0	0	1	0	0	0	0	0	0	0	0	0	0	0	0	0	1	0	0	1	1	0	1	0	1	1	100	0	100	0
6	35	8	2	0	0	0	0	0	4	0	0	0	0	0	0	0	0	4	0	0	0	4	0	4	0	0	0	4	1	0	0	0	0
6	36	8	2	0	1	0	0	0	0	0	0	0	0	0	0	0	0	1	0	0	0	1	0	1	0	1	0	1	1	0	0	100	0
7	37	9	2	0	3	0	0	0	0	0	0	0	0	0	0	0	0	3	0	0	0	3	0	3	0	3	0	3	1	0	0	100	0
7	38	9	2	0	3	1	1	0	0	0	0	0	0	0	0	0	1	3	1	1	0	4	1	4	1	5	0	5	1	20	20	100	0
7	39	9	2	0	5	1	1	0	2	0	0	0	0	0	0	0	1	7	1	1	0	8	1	8	1	7	0	9	1	11.1111	11.1111	77.7778	0
7	40	9	2	0	4	1	0	0	1	1	0	0	0	1	0	0	0	5	0	3	0	5	3	8	0	5	1	8	1	37.5	0	62.5	12.5
7	41	9	2	0	0	0	1	0	0	0	0	0	0	1	0	0	0	0	1	1	0	1	1	1	1	1	1	2	1	50	50	50	50
7	42	9	2	0	1	0	0	0	0	0	0	0	0	1	0	0	0	1	0	1	0	1	1	2	0	1	1	2	1	50	0	50	50
8	43	10	2	0	0	0	1	0	0	0	0	0	0	1	0	0	1	0	1	1	0	1	1	1	1	1	1	2	1	50	50	50	50
8	44	10	2	0	1	0	0	0	0	0	0	0	0	1	0	0	0	1	0	1	0	1	1	2	0	1	1	2	1	50	0	50	50
8	45	10	2	0	1	0	0	0	0	1	1	0	0	1	0	0	0	1	1	2	0	2	2	3	1	1	1	4	1	50	25	25	25
8	46	10	2	0	1	1	0	0	0	0	0	0	0	1	0	0	0	1	0	2	0	1	2	3	0	2	1	3	1	66.6667	0	66.6667	33.3333
8	47	10	2	0	5	0	0	0	1	0	0	0	0	0	0	0	0	6	0	0	0	6	0	6	0	5	0	6	1	0	0	83.3333	0
8	48	10	2	0	1	3	0	0	0	1	0	0	0	0	0	0	0	1	0	4	0	1	4	5	0	4	0	5	1	80	0	80	0
9	49	11	2	0	5	2	4	0	2	0	0	0	0	7	0	0	3	7	4	9	0	11	9	16	4	11	7	20	1	45	20	55	35
9	50	11	2	0	2	2	1	0	5	0	0	0	0	3	0	0	1	7	1	5	0	8	5	12	1	5	3	13	1	38.4615	7.69231	38.4615	23.0769
9	51	11	2	0	6	1	0	0	4	0	0	0	0	2	0	0	0	10	0	3	0	10	3	13	0	7	2	13	1	23.0769	0	53.8462	15.3846
9	52	11	2	0	4	4	1	0	1	0	1	0	0	0	0	0	1	5	2	4	0	7	4	9	2	9	0	11	1	36.3636	18.1818	81.8182	0
9	53	11	2	0	1	0	0	0	10	0	1	0	0	2	0	0	1	11	1	2	0	12	2	13	1	1	2	14	1	14.2857	7.14286	7.14286	14.2857
9	54	11	2	0	1	1	1	0	2	0	0	0	0	1	0	0	1	3	1	2	0	4	2	5	1	3	1	6	1	33.3333	16.6667	50	16.6667
10	55	1	2	0	2	0	0	0	0	0	0	0	0	0	0	0	0	2	0	0	0	2	0	2	0	2	0	2	1	0	0	100	0
10	56	1	2	0	6	0	0	0	1	0	1	0	0	1	0	0	1	7	1	1	0	8	1	8	1	6	1	9	1	11.1111	11.1111	66.6667	11.1111
10	57	1	2	0	4	0	3	0	1	0	2	0	1	0	0	0	4	6	5	0	0	11	0	6	5	7	1	11	1	0	45.4545	63.6364	9.09091
10	58	1	2	0	1	2	0	0	1	0	0	0	0	2	0	0	0	2	0	4	0	2	4	6	0	3	2	6	1	66.6667	0	50	33.3333
10	59	1	2	0	0	0	0	0	0	0	0	0	0	1	0	0	0	0	0	1	0	0	1	1	0	0	1	1	1	100	0	0	100
10	60	1	2	0	0	0	0	0	0	0	0	0	0	0	0	1	0	0	0	0	1	0	1	0	1	0	1	1	1	100	100	0	100
11	61	1	2	0	3	1	4	0	1	0	0	0	0	8	0	1	4	4	4	9	1	8	10	13	5	8	9	18	1	55.5556	27.7778	44.4444	50
11	62	2	2	0	3	0	1	0	0	1	0	0	0	0	0	0	1	3	1	1	0	4	1	4	1	4	0	5	1	20	20	80	0
11	63	2	2	0	1	0	0	0	0	0	0	0	0	0	0	0	0	1	0	0	0	1	0	1	0	1	0	1	1	0	0	100	0
11	64	2	2	0	3	0	1	0	7	0	4	0	0	0	0	0	4	10	5	0	0	15	0	10	5	4	0	15	1	0	33.3333	26.6667	0
11	65	2	2	0	5	0	1	0	8	0	6	0	0	2	0	0	6	13	7	2	0	20	2	15	7	6	2	22	1	9.09091	31.8182	27.2727	9.09091
11	66	2	2	0	10	2	3	0	1	2	1	0	0	4	0	0	3	11	4	8	0	15	8	19	4	15	4	23	1	34.7826	17.3913	65.2174	17.3913
12	67	2	2	0	10	1	2	0	7	0	0	0	0	2	0	0	1	17	2	3	0	19	3	20	2	13	2	22	1	13.6364	9.09091	59.0909	9.09091
12	68	3	2	0	14	0	15	0	2	0	5	0	2	7	1	0	11	18	21	7	0	39	7	25	21	29	10	46	1	15.2174	45.6522	63.0435	21.7391
12	69	3	2	0	6	4	6	0	0	1	1	0	4	8	0	0	5	10	7	13	0	17	13	23	7	16	12	30	1	43.3333	23.3333	53.3333	40
12	70	3	2	0	7	0	0	0	2	0	3	0	0	5	0	0	3	9	3	5	0	12	5	14	3	7	5	17	1	29.4118	17.6471	41.1765	29.4118
12	71	3	2	0	3	0	2	0	7	0	1	0	0	4	0	0	3	10	3	4	0	13	4	14	3	5	4	17	1	23.5294	17.6471	29.4118	23.5294
12	72	3	2	0	2	0	0	0	0	0	0	0	2	1	0	0	0	4	0	1	0	4	1	5	0	2	3	5	1	20	0	40	60
12	73	3	2	0	9	0	0	0	19	0	0	0	0	13	0	0	0	28	0	13	0	28	13	41	0	9	13	41	1	31.7073	0	21.9512	31.7073
1	1	5	3	0	2	0	0	0	1	0	0	0	0	3	0	0	0	3	0	3	0	3	3	6	0	2	3	6	1	50	0	33.3333	50
1	2	5	3	0	0	1	1	1	0	1	0	0	0	0	0	0	1	0	1	2	1	1	3	2	2	3	0	4	1	75	50	75	0
1	3	5	3	0	0	0	0	0	0	0	2	0	0	0	0	0	1	0	2	0	0	2	0	0	2	0	0	2	1	0	100	0	0
1	4	5	3	0	0	0	0	0	1	0	1	0	0	0	0	0	1	1	1	0	0	2	0	1	1	0	0	2	1	0	50	0	0
1	5	5	3	0	0	0	3	0	0	0	2	0	0	0	0	0	3	0	5	0	0	5	0	0	5	3	0	5	1	0	100	60	0
1	6	5	3	0	0	0	2	2	0	0	0	0	0	0	0	3	3	0	2	0	5	2	5	0	7	4	3	7	1	71.4286	100	57.1429	42.8571
2	7	6	3	0	4	2	4	1	3	0	2	0	0	0	1	0	5	7	7	2	1	14	3	9	8	11	1	17	1	17.6471	47.0588	64.7059	5.88235
2	8	6	3	0	8	2	2	0	5	0	0	0	0	3	0	0	1	13	2	5	0	15	5	18	2	12	3	20	1	25	10	60	15
2	9	6	3	0	1	0	0	0	5	0	0	0	0	0	0	0	0	6	0	0	0	6	0	6	0	1	0	6	1	0	0	16.6667	0
2	10	6	3	0	3	0	0	0	2	0	0	0	0	0	0	0	0	5	0	0	0	5	0	5	0	3	0	5	1	0	0	60	0
2	11	6	3	0	3	0	0	0	1	0	0	0	2	3	0	0	0	6	0	3	0	6	3	9	0	3	5	9	1	33.3333	0	33.3333	55.5556
2	12	6	3	0	0	0	0	0	0	0	0	0	0	2	0	0	0	0	0	2	0	0	2	2	0	0	2	2	1	100	0	0	100
3	13	7	3	0	4	1	0	0	1	1	0	0	1	1	0	0	0	6	0	3	0	6	3	9	0	5	2	9	1	33.3333	0	55.5556	22.2222
3	14	7	3	0	5	0	0	0	1	0	0	0	0	2	0	0	0	6	0	2	0	6	2	8	0	5	2	8	1	25	0	62.5	25
3	15	7	3	0	2	0	1	0	0	5	1	0	0	0	0	0	1	2	2	5	0	4	5	7	2	3	0	9	1	55.5556	22.2222	33.3333	0
3	16	7	3	0	5	3	2	0	1	0	0	0	0	3	0	0	1	6	2	6	0	8	6	12	2	10	3	14	1	42.8571	14.2857	71.4286	21.4286
3	17	7	3	0	6	4	1	0	10	0	3	0	0	4	0	0	4	16	4	8	0	20	8	24	4	11	4	28	1	28.5714	14.2857	39.2857	14.2857
3	18	7	3	0	6	4	0	0	0	1	0	0	0	0	0	0	0	6	0	5	0	6	5	11	0	10	0	11	1	45.4545	0	90.9091	0
4	19	8	3	0	6	1	2	0	7	0	3	0	0	1	0	0	4	13	5	2	0	18	2	15	5	9	1	20	1	10	25	45	5
4	20	8	3	0	6	0	0	0	3	0	0	0	0	3	0	0	0	9	0	3	0	9	3	12	0	6	3	12	1	25	0	50	25
4	21	8	3	0	14	2	4	0	1	1	4	0	0	0	0	0	8	15	8	3	0	23	3	18	8	20	0	26	1	11.5385	30.7692	76.9231	0
4	22	8	3	0	9	5	2	0	1	3	0	0	1	4	0	0	0	11	2	12	0	13	12	23	2	16	5	25	1	48	8	64	20
4	23	8	3	0	14	0	2	0	10	0	2	0	0	3	0	0	1	24	4	3	0	28	3	27	4	16	3	31	1	9.67742	12.9032	51.6129	9.67742
4	24	8	3	0	3	0	3	0	4	0	1	0	0	2	0	0	3	7	4	2	0	11	2	9	4	6	2	13	1	15.3846	30.7692	46.1538	15.3846
5	25	9	3	0	3	1	1	0	1	0	1	0	0	2	0	0	2	4	2	3	0	6	3	7	2	5	2	9	1	33.3333	22.2222	55.5556	22.2222
5	26	9	3	0	0	0	0	0	0	0	0	0	2	2	1	0	1	2	1	2	0	3	2	4	1	0	5	5	1	40	20	0	100
5	27	9	3	0	3	0	0	0	2	1	0	0	0	0	0	0	0	5	0	1	0	5	1	6	0	3	0	6	1	16.6667	0	50	0
5	28	9	3	0	2	5	1	0	0	0	0	0	0	0	0	0	1	2	1	5	0	3	5	7	1	8	0	8	1	62.5	12.5	100	0
5	29	9	3	0	5	1	1	0	7	0	3	0	0	4	0	0	3	12	4	5	0	16	5	17	4	7	4	21	1	23.8095	19.0476	33.3333	19.0476
5	30	9	3	0	2	1	1	0	4	0	3	0	0	0	0	0	4	6	4	1	0	10	1	7	4	4	0	11	1	9.09091	36.3636	36.3636	0
6	31	10	3	0	10	1	0	0	4	2	0	0	0	1	0	0	0	14	0	4	0	14	4	18	0	11	1	18	1	22.2222	0	61.1111	5.55556
6	32	10	3	0	2	1	1	0	5	0	1	0	0	4	0	0	2	7	2	5	0	9	5	12	2	4	4	14	1	35.7143	14.2857	28.5714	28.5714
6	33	10	3	0	2	1	0	0	0	0	0	0	0	0	0	0	0	2	0	1	0	2	1	3	0	3	0	3	1	33.3333	0	100	0
6	34	10	3	0	1	0	0	0	1	0	1	0	2	1	1	0	1	4	2	1	0	6	1	5	2	1	4	7	1	14.2857	28.5714	14.2857	57.1429
6	35	10	3	0	1	2	0	0	0	0	0	0	0	2	0	2	0	1	0	4	2	1	6	5	2	3	4	7	1	85.7143	28.5714	42.8571	57.1429
7	37	11	3	0	1	0	0	0	0	0	0	0	0	1	0	0	0	1	0	1	0	1	1	2	0	1	1	2	1	50	0	50	50
7	38	11	3	0	0	0	0	0	0	0	0	0	0	1	0	0	0	0	0	1	0	0	1	1	0	0	1	1	1	100	0	0	100
7	39	11	3	0	0	1	1	0	0	2	0	0	0	0	0	0	0	0	1	3	0	1	3	3	1	2	0	4	1	75	25	50	0
7	40	11	3	0	3	2	0	0	2	6	0	0	0	2	0	0	0	5	0	10	0	5	10	15	0	5	2	15	1	66.6667	0	33.3333	13.3333
7	41	11	3	0	0	5	0	0	4	2	0	0	0	1	0	0	0	4	0	8	0	4	8	12	0	5	1	12	1	66.6667	0	41.6667	8.33333
7	42	11	3	0	3	0	0	0	1	0	0	0	0	0	0	0	0	4	0	0	0	4	0	4	0	3	0	4	1	0	0	75	0
8	43	1	3	0	0	0	1	0	0	1	0	0	0	0	0	0	0	0	1	1	0	1	1	1	1	1	0	2	1	50	50	50	0
8	44	1	3	0	2	0	1	0	1	0	4	0	0	0	0	0	2	3	5	0	0	8	0	3	5	3	0	8	1	0	62.5	37.5	0
8	45	1	3	0	1	0	0	0	1	0	3	0	0	1	0	0	3	2	3	1	0	5	1	3	3	1	1	6	1	16.6667	50	16.6667	16.6667
8	46	1	3	0	0	0	0	0	0	0	0	0	0	1	0	0	0	0	0	1	0	0	1	1	0	0	1	1	1	100	0	0	100
8	47	1	3	0	2	0	0	0	1	0	0	0	0	0	0	0	0	3	0	0	0	3	0	3	0	2	0	3	1	0	0	66.6667	0
8	48	1	3	0	0	0	0	0	0	0	0	0	0	2	0	0	0	0	0	2	0	0	2	2	0	0	2	2	1	100	0	0	100
9	49	2	3	0	0	0	0	0	0	0	0	0	0	2	0	0	0	0	0	2	0	0	2	2	0	0	2	2	1	100	0	0	100
9	50	2	3	0	4	1	1	0	0	0	0	0	0	0	0	0	0	4	1	1	0	5	1	5	1	6	0	6	1	16.6667	16.6667	100	0
9	51	2	3	0	19	0	2	0	5	0	1	0	0	1	0	0	3	24	3	1	0	27	1	25	3	21	1	28	1	3.57143	10.7143	75	3.57143
9	52	2	3	0	1	2	0	0	2	2	4	0	0	2	0	0	3	3	4	6	0	7	6	9	4	3	2	13	1	46.1538	30.7692	23.0769	15.3846
9	53	2	3	0	6	3	3	0	5	0	1	0	1	7	0	0	3	12	4	10	0	16	10	22	4	12	8	26	1	38.4615	15.3846	46.1538	30.7692
9	54	2	3	0	6	1	1	0	7	0	2	0	0	2	0	0	3	13	3	3	0	16	3	16	3	8	2	19	1	15.7895	15.7895	42.1053	10.5263
10	55	3	3	0	0	1	1	0	0	0	0	0	0	0	0	0	1	0	1	1	0	1	1	1	1	2	0	2	1	50	50	100	0
10	56	3	3	0	1	1	0	0	1	0	1	0	0	3	1	0	2	2	2	4	0	4	4	6	2	2	4	8	1	50	25	25	50
10	57	3	3	0	2	0	2	0	0	0	2	0	0	0	0	0	4	2	4	0	0	6	0	2	4	4	0	6	1	0	66.6667	66.6667	0
10	58	3	3	0	2	2	1	0	1	0	1	0	1	5	1	1	3	4	3	7	1	7	8	11	4	5	8	15	1	53.3333	26.6667	33.3333	53.3333
10	59	3	3	0	0	4	1	0	2	2	0	0	1	0	0	0	1	3	1	6	0	4	6	9	1	5	1	10	1	60	10	50	10
10	60	3	3	0	8	1	2	1	3	0	0	0	0	2	0	0	2	11	2	3	1	13	4	14	3	12	2	17	1	23.5294	17.6471	70.5882	11.7647
11	61	4	3	0	2	0	1	0	0	0	0	0	0	3	0	0	1	2	1	3	0	3	3	5	1	3	3	6	1	50	16.6667	50	50
11	62	4	3	0	2	0	0	0	0	0	0	0	0	1	0	0	0	2	0	1	0	2	1	3	0	2	1	3	1	33.3333	0	66.6667	33.3333
11	63	4	3	0	6	3	3	0	0	0	1	0	0	2	0	1	5	6	4	5	1	10	6	11	5	12	3	16	1	37.5	31.25	75	18.75
11	64	4	3	0	6	5	2	0	3	3	0	0	0	11	0	0	1	9	2	19	0	11	19	28	2	13	11	30	1	63.3333	6.66667	43.3333	36.6667
11	65	4	3	0	6	4	0	0	1	0	0	0	0	8	0	0	0	7	0	12	0	7	12	19	0	10	8	19	1	63.1579	0	52.6316	42.1053
11	66	4	3	0	0	3	0	0	0	2	0	0	0	4	0	0	0	0	0	9	0	0	9	9	0	3	4	9	1	100	0	33.3333	44.4444
12	67	5	3	0	1	3	0	0	0	0	0	0	0	5	0	1	0	1	0	8	1	1	9	9	1	4	6	10	1	90	10	40	60
12	68	5	3	0	3	4	1	0	0	1	1	0	0	8	0	0	2	3	2	13	0	5	13	16	2	8	8	18	1	72.2222	11.1111	44.4444	44.4444
12	69	5	3	0	3	0	0	0	3	0	0	0	6	4	0	0	0	12	0	4	0	12	4	16	0	3	10	16	1	25	0	18.75	62.5
12	70	5	3	0	17	1	5	0	13	2	1	0	2	7	0	0	2	32	6	10	0	38	10	42	6	23	9	48	1	20.8333	12.5	47.9167	18.75
12	71	5	3	0	6	3	0	0	2	1	1	0	1	0	0	1	1	9	1	4	1	10	5	13	2	9	2	15	1	33.3333	13.3333	60	13.3333
12	72	5	3	0	24	0	0	1	18	0	4	0	0	10	0	1	5	42	4	10	2	46	12	52	6	25	11	58	1	20.6897	10.3448	43.1034	18.9655
12	73	5	3	0	35	3	3	0	17	3	0	0	16	12	0	1	3	68	3	18	1	71	19	86	4	41	29	90	1	21.1111	4.44444	45.5556	32.2222
1	1	6	4	0	0	0	0	0	0	0	0	0	0	0	0	0	0	0	0	0	0	0	0	0	0	0	0	0	1	#DIV/0!	#DIV/0!	#DIV/0!	#DIV/0!
1	2	6	4	0	0	0	0	0	1	0	0	0	0	0	0	0	0	1	0	0	0	1	0	1	0	0	0	1	1	0	0	0	0
1	3	6	4	0	0	0	0	0	0	0	0	0	0	0	0	0	0	0	0	0	0	0	0	0	0	0	0	0	1	#DIV/0!	#DIV/0!	#DIV/0!	#DIV/0!
1	4	6	4	0	0	0	1	0	0	0	0	0	0	0	0	0	1	0	1	0	0	1	0	0	1	1	0	1	1	0	100	100	0
1	5	6	4	0	0	0	3	0	0	0	2	1	0	0	0	0	3	0	5	0	1	5	1	0	6	3	0	6	1	16.6667	100	50	0
1	6	6	4	0	0	2	1	1	0	1	3	1	0	0	0	2	2	0	4	3	4	4	7	3	8	4	2	11	1	63.6364	72.7273	36.3636	18.1818
2	7	7	4	0	3	0	5	0	0	0	5	1	0	0	0	0	6	3	10	0	1	13	1	3	11	8	0	14	1	7.14286	78.5714	57.1429	0
2	8	7	4	0	1	3	5	0	2	1	7	0	0	0	0	0	8	3	12	4	0	15	4	7	12	9	0	19	1	21.0526	63.1579	47.3684	0
2	9	7	4	0	1	0	5	0	2	0	0	0	0	0	1	2	4	3	6	0	2	9	2	3	8	6	3	11	1	18.1818	72.7273	54.5455	27.2727
2	10	7	4	0	1	0	5	0	0	0	1	0	0	0	0	0	4	1	6	0	0	7	0	1	6	6	0	7	1	0	85.7143	85.7143	0
2	11	7	4	0	0	0	0	0	0	0	1	0	0	1	0	0	0	0	1	1	0	1	1	1	1	0	1	2	1	50	50	0	50
2	12	7	4	0	1	0	1	0	0	0	0	0	0	2	0	2	0	1	1	2	2	2	4	3	3	2	4	6	1	66.6667	50	33.3333	66.6667
3	13	8	4	0	7	0	7	2	0	2	0	1	0	2	0	2	5	7	7	4	5	14	9	11	12	16	4	23	1	39.1304	52.1739	69.5652	17.3913
3	14	8	4	0	2	0	1	0	1	0	1	0	0	1	0	2	2	3	2	1	2	5	3	4	4	3	3	8	1	37.5	50	37.5	37.5
3	15	8	4	0	1	1	4	0	0	1	2	0	0	0	0	0	5	1	6	2	0	7	2	3	6	6	0	9	1	22.2222	66.6667	66.6667	0
3	16	8	4	0	2	0	5	0	0	0	0	0	0	0	0	0	2	2	5	0	0	7	0	2	5	7	0	7	1	0	71.4286	100	0
3	17	8	4	0	5	3	3	2	0	3	4	1	0	3	0	2	5	5	7	9	5	12	14	14	12	13	5	26	1	53.8462	46.1538	50	19.2308
3	18	8	4	0	6	0	7	1	0	0	6	0	0	1	0	0	8	6	13	1	1	19	2	7	14	14	1	21	1	9.52381	66.6667	66.6667	4.7619
4	19	9	4	0	0	6	2	0	1	1	0	1	0	0	0	1	0	1	2	7	2	3	9	8	4	8	1	12	1	75	33.3333	66.6667	8.33333
4	20	9	4	0	6	0	11	0	0	0	7	0	0	0	0	0	14	6	18	0	0	24	0	6	18	17	0	24	1	0	75	70.8333	0
4	21	9	4	0	1	1	5	0	0	0	2	0	0	0	0	0	5	1	7	1	0	8	1	2	7	7	0	9	1	11.1111	77.7778	77.7778	0
4	22	9	4	0	1	0	6	0	0	0	4	0	0	1	1	2	8	1	11	1	2	12	3	2	13	7	4	15	1	20	86.6667	46.6667	26.6667
4	23	9	4	0	2	0	3	1	2	0	5	0	0	0	0	0	4	4	8	0	1	12	1	4	9	6	0	13	1	7.69231	69.2308	46.1538	0
4	24	9	4	0	0	2	11	1	0	0	2	0	0	0	0	0	10	0	13	2	1	13	3	2	14	14	0	16	1	18.75	87.5	87.5	0
5	25	10	4	0	1	0	1	0	0	1	0	0	0	2	0	3	1	1	1	3	3	2	6	4	4	2	5	8	1	75	50	25	62.5
5	26	10	4	0	1	0	3	0	0	0	0	0	0	0	0	2	3	1	3	0	2	4	2	1	5	4	2	6	1	33.3333	83.3333	66.6667	33.3333
5	27	10	4	0	3	0	0	0	1	0	2	0	0	0	0	0	0	4	2	0	0	6	0	4	2	3	0	6	1	0	33.3333	50	0
5	28	10	4	0	0	0	4	0	0	0	1	2	0	0	0	1	5	0	5	0	3	5	3	0	8	4	1	8	1	37.5	100	50	12.5
5	29	10	4	0	4	2	5	1	1	1	5	0	0	0	0	0	7	5	10	3	1	15	4	8	11	12	0	19	1	21.0526	57.8947	63.1579	0
5	30	10	4	0	2	1	1	0	0	0	0	0	0	1	0	0	1	2	1	2	0	3	2	4	1	4	1	5	1	40	20	80	20
6	31	11	4	0	6	1	2	0	7	1	0	0	0	0	0	0	1	13	2	2	0	15	2	15	2	9	0	17	1	11.7647	11.7647	52.9412	0
6	32	11	4	0	1	1	1	0	0	0	3	0	0	0	0	2	3	1	4	1	2	5	3	2	6	3	2	8	1	37.5	75	37.5	25
6	33	11	4	0	1	0	2	0	1	0	1	0	0	1	0	2	4	2	3	1	2	5	3	3	5	3	3	8	1	37.5	62.5	37.5	37.5
6	34	11	4	0	0	0	1	0	0	0	6	0	0	0	0	0	4	0	7	0	0	7	0	0	7	1	0	7	1	0	100	14.2857	0
6	35	11	4	0	3	0	3	0	0	0	0	0	0	0	0	0	1	3	3	0	0	6	0	3	3	6	0	6	1	0	50	100	0
6	36	11	4	0	0	0	0	0	0	0	0	0	0	1	0	0	0	0	0	1	0	0	1	1	0	0	1	1	1	100	0	0	100
7	37	1	4	0	0	0	1	0	0	1	0	0	0	0	0	1	0	0	1	1	1	1	2	1	2	1	1	3	1	66.6667	66.6667	33.3333	33.3333
7	38	1	4	0	1	0	0	1	0	0	2	0	0	0	0	0	0	1	2	0	1	3	1	1	3	2	0	4	1	25	75	50	0
7	39	1	4	0	0	0	1	0	0	0	0	0	0	0	0	0	1	0	1	0	0	1	0	0	1	1	0	1	1	0	100	100	0
7	40	1	4	0	1	0	5	0	0	0	0	0	0	0	0	0	2	1	5	0	0	6	0	1	5	6	0	6	1	0	83.3333	100	0
7	41	1	4	0	2	1	0	1	0	0	0	0	0	2	0	2	0	2	0	3	3	2	6	5	3	4	4	8	1	75	37.5	50	50
7	42	1	4	0	0	1	2	1	1	1	2	0	0	0	0	1	3	1	4	2	2	5	4	3	6	4	1	9	1	44.4444	66.6667	44.4444	11.1111
8	43	2	4	0	0	0	3	0	0	0	1	0	0	0	0	0	4	0	4	0	0	4	0	0	4	3	0	4	1	0	100	75	0
8	44	2	4	0	0	0	2	0	0	0	0	0	0	3	0	0	1	0	2	3	0	2	3	3	2	2	3	5	1	60	40	40	60
8	45	2	4	0	0	0	5	0	0	0	1	0	0	0	1	1	5	0	7	0	1	7	1	0	8	5	2	8	1	12.5	100	62.5	25
8	46	2	4	0	0	0	1	0	0	0	0	0	0	0	0	0	1	0	1	0	0	1	0	0	1	1	0	1	1	0	100	100	0
8	47	2	4	0	0	0	1	0	0	0	0	0	0	0	0	1	2	0	1	0	1	1	1	0	2	1	1	2	1	50	100	50	50
8	48	2	4	0	0	0	4	0	0	0	0	0	0	0	0	0	4	0	4	0	0	4	0	0	4	4	0	4	1	0	100	100	0
9	49	3	4	0	1	0	4	1	0	0	1	0	0	0	0	0	4	1	5	0	1	6	1	1	6	6	0	7	1	14.2857	85.7143	85.7143	0
9	50	3	4	0	1	0	5	1	0	0	1	0	0	0	0	1	7	1	6	0	2	7	2	1	8	7	1	9	1	22.2222	88.8889	77.7778	11.1111
9	51	3	4	0	1	0	2	0	0	0	4	0	0	0	0	0	6	1	6	0	0	7	0	1	6	3	0	7	1	0	85.7143	42.8571	0
9	52	3	4	0	0	0	3	0	0	0	0	0	0	2	0	0	2	0	3	2	0	3	2	2	3	3	2	5	1	40	60	60	40
9	53	3	4	0	1	0	1	0	0	1	0	0	0	1	0	2	3	1	1	2	2	2	4	3	3	2	3	6	1	66.6667	50	33.3333	50
9	54	3	4	0	2	0	3	0	3	1	2	0	0	0	0	1	4	5	5	1	1	10	2	6	6	5	1	12	1	16.6667	50	41.6667	8.33333
10	55	4	4	0	0	0	2	0	1	3	0	0	0	0	1	1	4	1	3	3	1	4	4	4	4	2	2	8	1	50	50	25	25
10	56	4	4	0	0	5	0	2	0	0	0	0	0	0	0	4	4	0	0	5	6	0	11	5	6	7	4	11	1	100	54.5455	63.6364	36.3636
10	57	4	4	0	0	0	7	1	0	0	0	0	0	0	0	1	7	0	7	0	2	7	2	0	9	8	1	9	1	22.2222	100	88.8889	11.1111
10	58	4	4	0	1	0	3	0	0	0	4	0	0	0	0	1	6	1	7	0	1	8	1	1	8	4	1	9	1	11.1111	88.8889	44.4444	11.1111
10	59	4	4	0	1	0	6	1	0	0	0	0	0	3	0	1	6	1	6	3	2	7	5	4	8	8	4	12	1	41.6667	66.6667	66.6667	33.3333
10	60	4	4	0	3	1	5	0	1	0	0	0	0	0	0	4	9	4	5	1	4	9	5	5	9	9	4	14	1	35.7143	64.2857	64.2857	28.5714
11	61	5	4	0	1	2	7	0	1	0	4	1	0	0	0	5	16	2	11	2	6	13	8	4	17	10	5	21	1	38.0952	80.9524	47.619	23.8095
11	62	5	4	0	1	2	1	0	0	0	0	0	0	1	0	1	2	1	1	3	1	2	4	4	2	4	2	6	1	66.6667	33.3333	66.6667	33.3333
11	63	5	4	0	2	0	0	0	0	0	0	0	0	1	1	1	1	2	1	1	1	3	2	3	2	2	3	5	1	40	40	40	60
11	64	5	4	0	0	3	0	0	2	0	0	0	0	2	0	2	2	2	0	5	2	2	7	7	2	3	4	9	1	77.7778	22.2222	33.3333	44.4444
11	65	5	4	0	0	2	1	1	1	2	1	2	0	2	0	1	4	1	2	6	4	3	10	7	6	4	3	13	1	76.9231	46.1538	30.7692	23.0769
11	66	5	4	0	0	1	1	0	0	2	0	0	0	0	0	1	0	0	1	3	1	1	4	3	2	2	1	5	1	80	40	40	20
12	67	6	4	0	10	0	8	1	0	0	1	0	0	1	0	0	9	10	9	1	1	19	2	11	10	19	1	21	1	9.52381	47.619	90.4762	4.7619
12	68	6	4	0	3	2	9	1	0	0	3	0	0	5	0	7	11	3	12	7	8	15	15	10	20	15	12	30	1	50	66.6667	50	40
12	69	6	4	0	4	0	15	0	6	1	18	1	0	5	0	4	23	10	33	6	5	43	11	16	38	19	9	54	1	20.3704	70.3704	35.1852	16.6667
12	70	6	4	0	0	4	3	0	3	0	1	0	0	1	0	6	4	3	4	5	6	7	11	8	10	7	7	18	1	61.1111	55.5556	38.8889	38.8889
12	71	6	4	0	14	0	26	2	12	0	22	0	1	8	0	1	45	27	48	8	3	75	11	35	51	42	10	86	1	12.7907	59.3023	48.8372	11.6279
12	72	6	4	0	7	0	4	0	1	2	1	0	1	2	0	2	6	9	5	4	2	14	6	13	7	11	5	20	1	30	35	55	25
12	73	6	4	0	28	2	25	2	23	0	19	1	1	8	3	5	45	52	47	10	8	99	18	62	55	57	17	117	1	15.3846	47.0085	48.7179	14.5299
1	1	8	5	0	4	0	0	0	0	0	0	0	0	0	0	0	0	4	0	0	0	4	0	4	0	4	0	4	1	0	0	100	0
1	2	8	5	0	0	0	0	0	1	0	2	0	0	0	0	0	1	1	2	0	0	3	0	1	2	0	0	3	1	0	66.6667	0	0
1	3	8	5	0	0	1	1	0	0	0	1	0	0	0	0	0	2	0	2	1	0	2	1	1	2	2	0	3	1	33.3333	66.6667	66.6667	0
1	4	8	5	0	0	0	0	0	0	1	1	0	0	0	0	0	1	0	1	1	0	1	1	1	1	0	0	2	1	50	50	0	0
1	5	8	5	0	0	0	0	0	1	0	1	0	0	0	0	0	1	1	1	0	0	2	0	1	1	0	0	2	1	0	50	0	0
1	6	8	5	0	0	0	4	0	0	1	0	0	0	0	0	0	4	0	4	1	0	4	1	1	4	4	0	5	1	20	80	80	0
2	7	9	5	0	0	0	1	0	0	1	0	1	0	0	0	0	2	0	1	1	1	1	2	1	2	1	0	3	1	66.6667	66.6667	33.3333	0
2	8	9	5	0	10	1	0	0	0	0	0	0	0	2	0	0	0	10	0	3	0	10	3	13	0	11	2	13	1	23.0769	0	84.6154	15.3846
2	9	9	5	0	3	1	2	0	2	0	0	0	0	1	0	0	1	5	2	2	0	7	2	7	2	6	1	9	1	22.2222	22.2222	66.6667	11.1111
2	10	9	5	0	4	0	0	0	3	0	0	0	0	2	0	0	0	7	0	2	0	7	2	9	0	4	2	9	1	22.2222	0	44.4444	22.2222
2	12	9	5	0	2	0	0	0	0	0	0	0	0	0	0	0	0	2	0	0	0	2	0	2	0	2	0	2	1	0	0	100	0
3	13	10	5	0	4	3	0	0	0	0	0	0	0	0	0	0	0	4	0	3	0	4	3	7	0	7	0	7	1	42.8571	0	100	0
3	14	10	5	0	2	0	0	0	1	0	1	0	0	0	0	0	0	3	1	0	0	4	0	3	1	2	0	4	1	0	25	50	0
3	15	10	5	0	0	0	2	0	0	0	0	0	0	1	0	0	2	0	2	1	0	2	1	1	2	2	1	3	1	33.3333	66.6667	66.6667	33.3333
3	16	10	5	0	1	0	0	0	0	0	0	0	0	0	0	0	0	1	0	0	0	1	0	1	0	1	0	1	1	0	0	100	0
3	17	10	5	0	1	0	0	1	2	0	0	0	0	0	0	0	1	3	0	0	1	3	1	3	1	2	0	4	1	25	25	50	0
3	18	10	5	0	0	0	0	0	1	0	0	0	0	0	0	0	0	1	0	0	0	1	0	1	0	0	0	1	1	0	0	0	0
4	19	11	5	0	0	0	4	1	0	2	0	0	0	0	0	0	5	0	4	2	1	4	3	2	5	5	0	7	1	42.8571	71.4286	71.4286	0
4	20	11	5	0	7	4	0	1	5	0	1	0	0	0	0	0	2	12	1	4	1	13	5	16	2	12	0	18	1	27.7778	11.1111	66.6667	0
4	21	11	5	0	20	17	4	1	4	2	0	0	0	0	0	0	1	24	4	19	1	28	20	43	5	42	0	48	1	41.6667	10.4167	87.5	0
4	22	11	5	0	6	0	12	1	5	0	7	0	0	0	0	0	13	11	19	0	1	30	1	11	20	19	0	31	1	3.22581	64.5161	61.2903	0
4	23	11	5	0	3	1	1	0	1	0	0	0	2	0	0	1	0	6	1	1	1	7	2	7	2	5	3	9	1	22.2222	22.2222	55.5556	33.3333
4	24	11	5	0	5	1	1	0	4	0	2	0	0	0	0	0	3	9	3	1	0	12	1	10	3	7	0	13	1	7.69231	23.0769	53.8462	0
5	25	1	5	0	0	0	2	0	0	0	1	0	0	0	0	0	3	0	3	0	0	3	0	0	3	2	0	3	1	0	100	66.6667	0
5	26	1	5	0	0	1	0	0	0	0	0	0	0	1	0	0	0	0	0	2	0	0	2	2	0	1	1	2	1	100	0	50	50
5	27	1	5	0	1	0	0	0	0	0	0	0	0	0	0	0	0	1	0	0	0	1	0	1	0	1	0	1	1	0	0	100	0
5	28	1	5	0	0	0	3	0	0	0	0	0	0	0	0	0	3	0	3	0	0	3	0	0	3	3	0	3	1	0	100	100	0
5	29	1	5	0	0	1	0	0	0	0	0	0	0	0	0	0	0	0	0	1	0	0	1	1	0	1	0	1	1	100	0	100	0
5	30	1	5	0	0	1	1	0	1	1	0	0	0	0	0	0	1	1	1	2	0	2	2	3	1	2	0	4	1	50	25	50	0
6	31	2	5	0	6	2	0	0	1	2	0	0	0	0	0	0	0	7	0	4	0	7	4	11	0	8	0	11	1	36.3636	0	72.7273	0
6	32	2	5	0	3	0	7	0	8	0	3	0	0	0	0	1	1	11	10	0	1	21	1	11	11	10	1	22	1	4.54545	50	45.4545	4.54545
6	33	2	5	0	6	1	2	0	4	0	3	0	0	2	0	0	5	10	5	3	0	15	3	13	5	9	2	18	1	16.6667	27.7778	50	11.1111
6	34	2	5	0	1	0	2	0	4	0	0	0	0	1	0	0	1	5	2	1	0	7	1	6	2	3	1	8	1	12.5	25	37.5	12.5
6	35	2	5	0	1	0	1	0	2	0	0	0	0	0	0	0	0	3	1	0	0	4	0	3	1	2	0	4	1	0	25	50	0
6	36	2	5	0	5	0	0	0	0	0	0	0	0	0	0	0	0	5	0	0	0	5	0	5	0	5	0	5	1	0	0	100	0
7	37	3	5	0	1	0	0	0	0	0	0	0	0	0	0	0	0	1	0	0	0	1	0	1	0	1	0	1	1	0	0	100	0
7	38	3	5	0	1	0	1	0	1	0	0	0	0	0	0	0	1	2	1	0	0	3	0	2	1	2	0	3	1	0	33.3333	66.6667	0
7	39	3	5	0	0	1	0	0	0	0	0	0	0	1	0	0	0	0	0	2	0	0	2	2	0	1	1	2	1	100	0	50	50
7	40	3	5	0	0	0	0	0	0	0	1	0	0	0	0	0	0	0	1	0	0	1	0	0	1	0	0	1	1	0	100	0	0
7	41	3	5	0	0	4	0	0	0	0	0	0	0	0	0	0	0	0	0	4	0	0	4	4	0	4	0	4	1	100	0	100	0
7	42	3	5	0	1	0	1	0	0	0	0	0	0	0	0	0	1	1	1	0	0	2	0	1	1	2	0	2	1	0	50	100	0
8	43	4	5	0	3	1	0	0	0	0	0	0	0	1	0	0	0	3	0	2	0	3	2	5	0	4	1	5	1	40	0	80	20
8	44	4	5	0	2	0	1	0	0	1	4	0	0	1	0	0	3	2	5	2	0	7	2	4	5	3	1	9	1	22.2222	55.5556	33.3333	11.1111
8	45	4	5	0	0	0	0	0	1	0	0	0	0	0	0	0	0	1	0	0	0	1	0	1	0	0	0	1	1	0	0	0	0
8	46	4	5	0	2	0	1	0	0	0	0	0	1	2	0	0	1	3	1	2	0	4	2	5	1	3	3	6	1	33.3333	16.6667	50	50
8	47	4	5	0	1	1	0	0	0	0	0	0	0	0	0	0	0	1	0	1	0	1	1	2	0	2	0	2	1	50	0	100	0
8	48	4	5	0	2	1	0	0	0	0	0	0	0	0	0	0	0	2	0	1	0	2	1	3	0	3	0	3	1	33.3333	0	100	0
9	49	5	5	0	0	0	0	0	3	0	0	0	0	3	0	0	0	3	0	3	0	3	3	6	0	0	3	6	1	50	0	0	50
9	50	5	5	0	0	0	1	0	2	0	0	0	0	1	0	0	1	2	1	1	0	3	1	3	1	1	1	4	1	25	25	25	25
9	51	5	5	0	0	1	0	0	0	1	0	0	0	1	0	0	0	0	0	3	0	0	3	3	0	1	1	3	1	100	0	33.3333	33.3333
9	52	5	5	0	0	1	0	0	0	0	0	0	1	0	0	0	0	1	0	1	0	1	1	2	0	1	1	2	1	50	0	50	50
10	55	6	5	0	1	2	0	0	3	1	0	0	0	2	0	0	0	4	0	5	0	4	5	9	0	3	2	9	1	55.5556	0	33.3333	22.2222
10	56	6	5	0	0	0	1	0	0	1	0	0	0	1	0	0	1	0	1	2	0	1	2	2	1	1	1	3	1	66.6667	33.3333	33.3333	33.3333
10	57	6	5	0	3	0	0	0	1	1	0	0	0	1	0	0	0	4	0	2	0	4	2	6	0	3	1	6	1	33.3333	0	50	16.6667
10	58	6	5	0	2	2	1	0	3	0	0	0	0	1	0	0	1	5	1	3	0	6	3	8	1	5	1	9	1	33.3333	11.1111	55.5556	11.1111
10	59	6	5	0	1	0	0	0	2	0	0	0	0	0	0	0	0	3	0	0	0	3	0	3	0	1	0	3	1	0	0	33.3333	0
10	60	6	5	0	3	0	0	0	0	1	0	0	0	0	0	0	0	3	0	1	0	3	1	4	0	3	0	4	1	25	0	75	0
11	61	7	5	0	2	0	0	0	1	0	0	0	0	2	0	0	0	3	0	2	0	3	2	5	0	2	2	5	1	40	0	40	40
11	62	7	5	0	0	0	0	0	2	0	1	0	0	0	0	0	1	2	1	0	0	3	0	2	1	0	0	3	1	0	33.3333	0	0
11	63	7	5	0	11	0	9	0	2	1	0	0	0	1	0	0	8	13	9	2	0	22	2	15	9	20	1	24	1	8.33333	37.5	83.3333	4.16667
11	64	7	5	0	7	2	1	0	0	0	1	0	0	0	0	0	2	7	2	2	0	9	2	9	2	10	0	11	1	18.1818	18.1818	90.9091	0
11	65	7	5	0	2	0	1	0	1	0	0	0	0	2	0	0	1	3	1	2	0	4	2	5	1	3	2	6	1	33.3333	16.6667	50	33.3333
11	66	7	5	0	0	1	2	0	2	0	1	0	0	2	0	0	3	2	3	3	0	5	3	5	3	3	2	8	1	37.5	37.5	37.5	25
12	67	8	5	0	16	2	1	0	1	1	0	0	1	3	0	0	1	18	1	6	0	19	6	24	1	19	4	25	1	24	4	76	16
12	68	8	5	0	1	6	1	0	1	2	0	0	0	1	0	0	0	2	1	9	0	3	9	11	1	8	1	12	1	75	8.33333	66.6667	8.33333
12	69	8	5	0	19	0	2	0	13	0	2	0	0	5	0	0	4	32	4	5	0	36	5	37	4	21	5	41	1	12.1951	9.7561	51.2195	12.1951
12	70	8	5	0	13	2	7	0	12	2	0	0	0	3	0	0	3	25	7	7	0	32	7	32	7	22	3	39	1	17.9487	17.9487	56.4103	7.69231
12	71	8	5	0	5	2	0	0	17	0	5	0	0	2	0	1	6	22	5	4	1	27	5	26	6	7	3	32	1	15.625	18.75	21.875	9.375
12	72	8	5	0	7	0	2	0	7	0	1	0	0	2	0	0	3	14	3	2	0	17	2	16	3	9	2	19	1	10.5263	15.7895	47.3684	10.5263
12	73	8	5	0	13	1	1	0	9	1	6	0	1	3	0	0	6	23	7	5	0	30	5	28	7	15	4	35	1	14.2857	20	42.8571	11.4286
1	1	9	6	0	0	0	2	2	0	0	1	1	0	0	0	1	1	0	3	0	4	3	4	0	7	4	1	7	1	57.1429	100	57.1429	14.2857
1	2	9	6	0	0	0	5	0	0	0	1	0	0	0	0	0	6	0	6	0	0	6	0	0	6	5	0	6	1	0	100	83.3333	0
1	3	9	6	0	0	1	0	0	2	0	5	1	0	0	0	0	2	2	5	1	1	7	2	3	6	1	0	9	1	22.2222	66.6667	11.1111	0
1	4	9	6	0	0	0	2	1	0	0	2	0	0	0	0	0	2	0	4	0	1	4	1	0	5	3	0	5	1	20	100	60	0
1	5	9	6	0	1	0	1	0	0	0	3	0	0	0	0	0	4	1	4	0	0	5	0	1	4	2	0	5	1	0	80	40	0
1	6	9	6	0	0	0	0	0	0	0	0	1	0	0	0	0	1	0	0	0	1	0	1	0	1	0	0	1	1	100	100	0	0
2	7	10	6	0	2	0	2	0	0	0	1	0	0	0	0	0	1	2	3	0	0	5	0	2	3	4	0	5	1	0	60	80	0
2	8	10	6	0	0	1	7	2	0	0	0	1	0	0	0	0	6	0	7	1	3	7	4	1	10	10	0	11	1	36.3636	90.9091	90.9091	0
2	9	10	6	0	0	1	2	3	0	0	0	0	0	0	0	1	1	0	2	1	4	2	5	1	6	6	1	7	1	71.4286	85.7143	85.7143	14.2857
2	10	10	6	0	1	2	2	0	1	0	1	0	0	0	0	1	3	2	3	2	1	5	3	4	4	5	1	8	1	37.5	50	62.5	12.5
2	11	10	6	0	6	0	9	0	1	0	7	0	0	0	1	1	11	7	17	0	1	24	1	7	18	15	2	25	1	4	72	60	8
2	12	10	6	0	0	1	2	0	0	0	0	0	0	1	0	0	1	0	2	2	0	2	2	2	2	3	1	4	1	50	50	75	25
3	13	11	6	0	0	0	2	0	3	0	2	0	0	0	0	1	4	3	4	0	1	7	1	3	5	2	1	8	1	12.5	62.5	25	12.5
3	14	11	6	0	2	0	4	0	2	0	0	0	0	0	0	0	2	4	4	0	0	8	0	4	4	6	0	8	1	0	50	75	0
3	15	11	6	0	1	0	2	0	0	0	1	0	0	0	2	0	3	1	5	0	0	6	0	1	5	3	2	6	1	0	83.3333	50	33.3333
3	16	11	6	0	0	0	3	0	0	0	0	0	0	0	0	1	1	0	3	0	1	3	1	0	4	3	1	4	1	25	100	75	25
3	17	11	6	0	2	0	2	0	0	1	1	1	0	1	0	0	1	2	3	2	1	5	3	4	4	4	1	8	1	37.5	50	50	12.5
3	18	11	6	0	0	0	0	0	1	0	1	0	0	0	0	0	0	1	1	0	0	2	0	1	1	0	0	2	1	0	50	0	0
4	19	1	6	0	0	0	2	0	0	0	1	0	0	0	0	0	3	0	3	0	0	3	0	0	3	2	0	3	1	0	100	66.6667	0
4	20	1	6	0	2	0	3	0	0	0	0	0	0	0	0	0	3	2	3	0	0	5	0	2	3	5	0	5	1	0	60	100	0
4	21	1	6	0	0	2	1	0	0	0	0	0	0	0	0	1	2	0	1	2	1	1	3	2	2	3	1	4	1	75	50	75	25
4	22	1	6	0	1	0	7	0	0	0	1	0	0	0	0	0	4	1	8	0	0	9	0	1	8	8	0	9	1	0	88.8889	88.8889	0
4	23	1	6	0	2	1	10	0	0	0	3	0	0	0	0	0	7	2	13	1	0	15	1	3	13	13	0	16	1	6.25	81.25	81.25	0
4	24	1	6	0	1	0	4	0	0	0	2	0	0	0	1	0	4	1	7	0	0	8	0	1	7	5	1	8	1	0	87.5	62.5	12.5
5	25	2	6	0	1	0	8	0	0	0	1	0	0	0	2	1	10	1	11	0	1	12	1	1	12	9	3	13	1	7.69231	92.3077	69.2308	23.0769
5	26	2	6	0	0	0	1	0	0	0	0	0	0	0	0	0	1	0	1	0	0	1	0	0	1	1	0	1	1	0	100	100	0
5	27	2	6	0	2	1	1	1	0	0	0	0	0	0	0	0	0	2	1	1	1	3	2	3	2	5	0	5	1	40	40	100	0
5	28	2	6	0	0	0	1	0	0	0	0	0	0	0	0	1	2	0	1	0	1	1	1	0	2	1	1	2	1	50	100	50	50
5	29	2	6	0	0	0	1	0	0	0	0	0	0	1	0	0	1	0	1	1	0	1	1	1	1	1	1	2	1	50	50	50	50
6	31	3	6	0	1	0	3	0	0	0	3	0	0	0	0	0	3	1	6	0	0	7	0	1	6	4	0	7	1	0	85.7143	57.1429	0
6	32	3	6	0	0	14	8	0	0	1	1	1	0	1	0	0	6	0	9	16	1	9	17	16	10	22	1	26	1	65.3846	38.4615	84.6154	3.84615
6	33	3	6	0	1	2	1	0	0	0	0	0	0	0	0	0	1	1	1	2	0	2	2	3	1	4	0	4	1	50	25	100	0
6	34	3	6	0	0	0	0	0	0	2	0	0	0	0	0	1	1	0	0	2	1	0	3	2	1	0	1	3	1	100	33.3333	0	33.3333
6	35	3	6	0	3	0	6	0	0	0	3	0	0	0	0	0	7	3	9	0	0	12	0	3	9	9	0	12	1	0	75	75	0
6	36	3	6	0	1	0	1	0	0	1	1	0	0	0	0	0	1	1	2	1	0	3	1	2	2	2	0	4	1	25	50	50	0
7	37	4	6	0	0	0	3	0	0	0	0	0	0	0	0	0	2	0	3	0	0	3	0	0	3	3	0	3	1	0	100	100	0
7	38	4	6	0	0	0	0	0	0	0	1	0	0	0	0	0	1	0	1	0	0	1	0	0	1	0	0	1	1	0	100	0	0
7	39	4	6	0	0	0	7	1	1	0	1	0	0	0	1	5	11	1	9	0	6	10	6	1	15	8	6	16	1	37.5	93.75	50	37.5
7	40	4	6	0	0	0	5	0	0	0	0	0	0	0	0	1	3	0	5	0	1	5	1	0	6	5	1	6	1	16.6667	100	83.3333	16.6667
7	42	4	6	0	0	1	6	1	0	0	0	0	0	0	0	1	4	0	6	1	2	6	3	1	8	8	1	9	1	33.3333	88.8889	88.8889	11.1111
8	43	5	6	0	0	0	2	2	0	0	1	0	0	0	0	1	4	0	3	0	3	3	3	0	6	4	1	6	1	50	100	66.6667	16.6667
8	44	5	6	0	0	0	0	0	0	0	0	0	0	0	0	1	0	0	0	0	1	0	1	0	1	0	1	1	1	100	100	0	100
8	45	5	6	0	1	0	0	0	0	0	2	0	0	0	0	0	1	1	2	0	0	3	0	1	2	1	0	3	1	0	66.6667	33.3333	0
8	46	5	6	0	0	0	1	0	0	0	1	0	0	1	0	0	2	0	2	1	0	2	1	1	2	1	1	3	1	33.3333	66.6667	33.3333	33.3333
8	47	5	6	0	1	0	0	0	0	0	0	0	0	0	0	0	0	1	0	0	0	1	0	1	0	1	0	1	1	0	0	100	0
8	48	5	6	0	0	0	1	0	0	0	1	1	0	0	0	0	2	0	2	0	1	2	1	0	3	1	0	3	1	33.3333	100	33.3333	0
9	49	6	6	0	0	0	3	0	0	0	1	1	0	0	0	0	4	0	4	0	1	4	1	0	5	3	0	5	1	20	100	60	0
9	50	6	6	0	1	0	2	0	0	0	5	0	0	1	0	0	7	1	7	1	0	8	1	2	7	3	1	9	1	11.1111	77.7778	33.3333	11.1111
9	51	6	6	0	1	2	2	2	0	0	0	0	0	5	0	1	3	1	2	7	3	3	10	8	5	7	6	13	1	76.9231	38.4615	53.8462	46.1538
9	52	6	6	0	1	0	5	0	1	0	1	0	0	2	0	1	6	2	6	2	1	8	3	4	7	6	3	11	1	27.2727	63.6364	54.5455	27.2727
9	53	6	6	0	0	0	2	0	0	0	1	0	0	0	0	0	3	0	3	0	0	3	0	0	3	2	0	3	1	0	100	66.6667	0
9	54	6	6	0	1	0	1	0	0	0	0	0	0	0	0	0	1	1	1	0	0	2	0	1	1	2	0	2	1	0	50	100	0
10	55	7	6	0	0	0	4	0	0	0	0	0	0	0	0	1	5	0	4	0	1	4	1	0	5	4	1	5	1	20	100	80	20
10	56	7	6	0	0	0	4	0	1	0	1	0	0	0	0	0	5	1	5	0	0	6	0	1	5	4	0	6	1	0	83.3333	66.6667	0
10	57	7	6	0	0	0	3	0	0	0	0	0	0	0	0	0	3	0	3	0	0	3	0	0	3	3	0	3	1	0	100	100	0
10	58	7	6	0	1	0	4	1	0	0	1	0	0	0	0	0	6	1	5	0	1	6	1	1	6	6	0	7	1	14.2857	85.7143	85.7143	0
10	59	7	6	0	3	1	3	0	1	0	2	0	1	1	0	0	5	5	5	2	0	10	2	7	5	7	2	12	1	16.6667	41.6667	58.3333	16.6667
10	60	7	6	0	1	0	3	0	1	0	2	1	0	1	0	0	6	2	5	1	1	7	2	3	6	4	1	9	1	22.2222	66.6667	44.4444	11.1111
11	61	8	6	0	0	1	2	0	0	0	1	0	0	0	0	0	3	0	3	1	0	3	1	1	3	3	0	4	1	25	75	75	0
11	62	8	6	0	0	0	6	0	0	0	0	0	0	0	0	0	5	0	6	0	0	6	0	0	6	6	0	6	1	0	100	100	0
11	63	8	6	0	0	0	8	0	1	0	4	0	0	0	0	0	12	1	12	0	0	13	0	1	12	8	0	13	1	0	92.3077	61.5385	0
11	64	8	6	0	1	0	3	0	0	0	2	0	0	0	0	2	7	1	5	0	2	6	2	1	7	4	2	8	1	25	87.5	50	25
11	65	8	6	0	1	0	8	0	0	0	5	0	0	1	0	0	13	1	13	1	0	14	1	2	13	9	1	15	1	6.66667	86.6667	60	6.66667
11	66	8	6	0	0	1	1	0	0	0	0	0	0	0	0	0	1	0	1	1	0	1	1	1	1	2	0	2	1	50	50	100	0
12	67	9	6	0	2	0	6	0	0	0	5	0	1	1	0	1	12	3	11	1	1	14	2	4	12	8	3	16	1	12.5	75	50	18.75
12	68	9	6	0	0	0	8	0	1	0	1	0	0	1	0	3	9	1	9	1	3	10	4	2	12	8	4	14	1	28.5714	85.7143	57.1429	28.5714
12	69	9	6	0	1	2	11	1	4	1	10	0	0	0	0	3	18	5	21	3	4	26	7	8	25	15	3	33	1	21.2121	75.7576	45.4545	9.09091
12	70	9	6	0	5	0	13	1	0	1	7	2	0	0	0	1	15	5	20	1	4	25	5	6	24	19	1	30	1	16.6667	80	63.3333	3.33333
12	71	9	6	0	2	0	6	1	0	0	6	0	1	0	0	0	9	3	12	0	1	15	1	3	13	9	1	16	1	6.25	81.25	56.25	6.25
12	72	9	6	0	12	0	4	1	24	0	12	0	0	1	0	2	16	36	16	1	3	52	4	37	19	17	3	56	1	7.14286	33.9286	30.3571	5.35714
12	73	9	6	0	18	17	10	6	13	2	16	1	1	6	0	4	28	32	26	25	11	58	36	57	37	51	11	94	1	38.2979	39.3617	54.2553	11.7021
1	1	11	7	0	0	0	1	0	0	0	0	0	0	0	0	0	1	0	1	0	0	1	0	0	1	1	0	1	1	0	100	100	0
1	2	11	7	0	0	0	1	0	0	0	2	0	0	0	0	0	3	0	3	0	0	3	0	0	3	1	0	3	1	0	100	33.3333	0
1	3	11	7	0	1	0	2	0	1	0	1	0	0	0	2	2	2	2	5	0	2	7	2	2	7	3	4	9	1	22.2222	77.7778	33.3333	44.4444
1	4	11	7	0	2	0	3	0	0	0	2	1	0	0	0	0	2	2	5	0	1	7	1	2	6	5	0	8	1	12.5	75	62.5	0
1	6	11	7	0	1	0	4	0	0	0	2	0	0	0	0	0	4	1	6	0	0	7	0	1	6	5	0	7	1	0	85.7143	71.4286	0
2	7	1	7	0	2	0	1	0	0	0	1	0	0	0	0	1	0	2	2	0	1	4	1	2	3	3	1	5	1	20	60	60	20
2	9	1	7	0	0	0	3	0	0	0	0	0	0	0	0	0	1	0	3	0	0	3	0	0	3	3	0	3	1	0	100	100	0
2	10	1	7	0	2	0	0	0	0	0	0	0	0	0	0	0	0	2	0	0	0	2	0	2	0	2	0	2	1	0	0	100	0
2	11	1	7	0	1	0	1	0	0	0	6	0	0	0	0	0	5	1	7	0	0	8	0	1	7	2	0	8	1	0	87.5	25	0
2	12	1	7	0	0	0	1	0	0	0	1	0	0	0	0	0	0	0	2	0	0	2	0	0	2	1	0	2	1	0	100	50	0
3	13	2	7	0	3	0	5	5	0	0	0	0	0	2	0	2	10	3	5	2	7	8	9	5	12	13	4	17	1	52.9412	70.5882	76.4706	23.5294
3	14	2	7	0	1	1	9	0	0	0	1	0	0	4	0	2	7	1	10	5	2	11	7	6	12	11	6	18	1	38.8889	66.6667	61.1111	33.3333
3	15	2	7	0	0	0	2	0	0	0	2	0	0	0	0	0	1	0	4	0	0	4	0	0	4	2	0	4	1	0	100	50	0
3	16	2	7	0	0	0	5	0	0	0	1	2	0	0	0	0	7	0	6	0	2	6	2	0	8	5	0	8	1	25	100	62.5	0
3	17	2	7	0	0	0	0	1	0	0	0	0	0	1	0	0	0	0	0	1	1	0	2	1	1	1	1	2	1	100	50	50	50
4	19	3	7	0	0	0	1	2	0	0	0	0	0	0	0	0	0	0	1	0	2	1	2	0	3	3	0	3	1	66.6667	100	100	0
4	20	3	7	0	0	1	0	0	0	0	0	0	0	0	0	1	0	0	0	1	1	0	2	1	1	1	1	2	1	100	50	50	50
4	21	3	7	0	1	0	1	0	0	0	0	0	0	0	0	0	0	1	1	0	0	2	0	1	1	2	0	2	1	0	50	100	0
4	22	3	7	0	0	0	1	0	1	1	4	0	0	1	0	1	2	1	5	2	1	6	3	3	6	1	2	9	1	33.3333	66.6667	11.1111	22.2222
4	23	3	7	0	2	0	0	0	0	0	0	0	0	0	0	1	0	2	0	0	1	2	1	2	1	2	1	3	1	33.3333	33.3333	66.6667	33.3333
4	24	3	7	0	0	0	3	0	0	0	0	0	0	0	0	0	3	0	3	0	0	3	0	0	3	3	0	3	1	0	100	100	0
5	25	4	7	0	0	0	0	0	1	0	2	0	0	0	0	1	2	1	2	0	1	3	1	1	3	0	1	4	1	25	75	0	25
5	26	4	7	0	0	1	2	1	0	0	2	1	0	1	0	5	5	0	4	2	7	4	9	2	11	4	6	13	1	69.2308	84.6154	30.7692	46.1538
5	27	4	7	0	0	0	3	0	0	0	1	0	0	0	0	0	2	0	4	0	0	4	0	0	4	3	0	4	1	0	100	75	0
5	28	4	7	0	0	0	14	0	0	0	3	0	1	1	0	0	15	1	17	1	0	18	1	2	17	14	2	19	1	5.26316	89.4737	73.6842	10.5263
5	29	4	7	0	2	0	11	0	0	0	5	0	0	0	0	2	13	2	16	0	2	18	2	2	18	13	2	20	1	10	90	65	10
5	30	4	7	0	0	0	0	0	0	0	0	0	0	0	0	1	0	0	0	0	1	0	1	0	1	0	1	1	1	100	100	0	100
6	31	5	7	0	2	0	1	0	0	0	0	0	0	0	0	1	0	2	1	0	1	3	1	2	2	3	1	4	1	25	50	75	25
6	32	5	7	0	0	0	2	0	1	0	0	0	0	0	0	0	1	1	2	0	0	3	0	1	2	2	0	3	1	0	66.6667	66.6667	0
6	33	5	7	0	0	0	1	1	0	0	1	0	0	0	0	0	1	0	2	0	1	2	1	0	3	2	0	3	1	33.3333	100	66.6667	0
6	34	5	7	0	0	0	2	0	1	1	0	0	0	0	0	0	2	1	2	1	0	3	1	2	2	2	0	4	1	25	50	50	0
6	35	5	7	0	0	0	0	0	0	0	0	0	0	1	0	0	0	0	0	1	0	0	1	1	0	0	1	1	1	100	0	0	100
6	36	5	7	0	0	0	1	0	0	0	0	0	0	0	0	0	1	0	1	0	0	1	0	0	1	1	0	1	1	0	100	100	0
7	37	6	7	0	0	0	4	0	0	0	0	0	0	1	0	2	3	0	4	1	2	4	3	1	6	4	3	7	1	42.8571	85.7143	57.1429	42.8571
7	38	6	7	0	0	0	4	0	0	0	1	0	0	0	1	0	5	0	6	0	0	6	0	0	6	4	1	6	1	0	100	66.6667	16.6667
7	39	6	7	0	0	0	4	0	0	0	2	0	0	0	0	0	6	0	6	0	0	6	0	0	6	4	0	6	1	0	100	66.6667	0
7	40	6	7	0	0	0	1	0	0	1	0	0	0	0	0	0	0	0	1	1	0	1	1	1	1	1	0	2	1	50	50	50	0
7	41	6	7	0	0	0	1	0	0	0	0	0	0	0	0	0	0	0	1	0	0	1	0	0	1	1	0	1	1	0	100	100	0
7	42	6	7	0	0	0	0	1	0	0	0	0	0	0	0	0	1	0	0	0	1	0	1	0	1	1	0	1	1	100	100	100	0
8	43	7	7	0	0	0	2	0	0	0	0	0	0	0	1	0	2	0	3	0	0	3	0	0	3	2	1	3	1	0	100	66.6667	33.3333
8	44	7	7	0	0	1	2	1	0	0	1	0	0	1	0	2	2	0	3	2	3	3	5	2	6	4	3	8	1	62.5	75	50	37.5
8	45	7	7	0	0	0	1	0	0	0	1	0	0	1	0	1	2	0	2	1	1	2	2	1	3	1	2	4	1	50	75	25	50
8	46	7	7	0	1	0	0	0	0	1	0	0	0	0	0	1	0	1	0	1	1	1	2	2	1	1	1	3	1	66.6667	33.3333	33.3333	33.3333
8	47	7	7	0	0	0	1	0	0	1	3	1	0	0	0	0	5	0	4	1	1	4	2	1	5	1	0	6	1	33.3333	83.3333	16.6667	0
8	48	7	7	0	0	1	4	0	0	0	3	0	0	1	1	1	5	0	8	2	1	8	3	2	9	5	3	11	1	27.2727	81.8182	45.4545	27.2727
9	49	8	7	0	0	0	5	1	0	0	0	0	0	1	0	5	4	0	5	1	6	5	7	1	11	6	6	12	1	58.3333	91.6667	50	50
9	50	8	7	0	0	0	8	0	0	1	6	0	0	0	1	1	13	0	15	1	1	15	2	1	16	8	2	17	1	11.7647	94.1176	47.0588	11.7647
9	51	8	7	0	0	0	3	2	2	0	4	0	0	1	2	1	7	2	9	1	3	11	4	3	12	5	4	15	1	26.6667	80	33.3333	26.6667
9	52	8	7	0	3	0	5	1	1	0	2	0	0	0	1	1	9	4	8	0	2	12	2	4	10	9	2	14	1	14.2857	71.4286	64.2857	14.2857
9	53	8	7	0	1	0	5	0	0	1	0	1	0	1	0	2	7	1	5	2	3	6	5	3	8	6	3	11	1	45.4545	72.7273	54.5455	27.2727
9	54	8	7	0	0	0	1	2	0	0	0	0	0	0	0	0	1	0	1	0	2	1	2	0	3	3	0	3	1	66.6667	100	100	0
10	55	9	7	0	0	0	1	0	0	0	0	0	0	1	0	2	3	0	1	1	2	1	3	1	3	1	3	4	1	75	75	25	75
10	56	9	7	0	1	0	0	0	0	0	0	0	0	0	0	0	0	1	0	0	0	1	0	1	0	1	0	1	1	0	0	100	0
10	57	9	7	0	0	0	0	0	0	0	0	0	0	0	0	3	3	0	0	0	3	0	3	0	3	0	3	3	1	100	100	0	100
10	58	9	7	0	0	0	0	0	0	0	0	0	0	0	0	3	3	0	0	0	3	0	3	0	3	0	3	3	1	100	100	0	100
10	59	9	7	0	0	0	1	0	0	0	2	2	0	0	0	0	4	0	3	0	2	3	2	0	5	1	0	5	1	40	100	20	0
10	60	9	7	0	0	1	1	0	1	0	0	1	0	0	0	0	2	1	1	1	1	2	2	2	2	2	0	4	1	50	50	50	0
11	61	10	7	0	0	1	0	0	0	0	4	0	0	0	0	0	4	0	4	1	0	4	1	1	4	1	0	5	1	20	80	20	0
11	62	10	7	0	0	0	2	0	0	0	0	0	0	1	0	4	6	0	2	1	4	2	5	1	6	2	5	7	1	71.4286	85.7143	28.5714	71.4286
11	63	10	7	0	0	0	5	1	0	1	3	0	2	1	0	3	9	2	8	2	4	10	6	4	12	6	6	16	1	37.5	75	37.5	37.5
11	64	10	7	0	1	0	4	0	2	0	3	0	0	0	0	0	6	3	7	0	0	10	0	3	7	5	0	10	1	0	70	50	0
11	65	10	7	0	1	0	4	2	0	0	5	0	0	1	3	0	13	1	12	1	2	13	3	2	14	7	4	16	1	18.75	87.5	43.75	25
11	66	10	7	0	6	2	10	0	3	1	3	0	0	3	1	2	15	9	14	6	2	23	8	15	16	18	6	31	1	25.8065	51.6129	58.0645	19.3548
12	67	11	7	0	6	1	9	2	2	1	5	2	0	2	0	4	13	8	14	4	8	22	12	12	22	18	6	34	1	35.2941	64.7059	52.9412	17.6471
12	68	11	7	0	0	1	11	0	2	0	17	0	2	1	3	4	23	4	31	2	4	35	6	6	35	12	10	41	1	14.6341	85.3659	29.2683	24.3902
12	69	11	7	0	1	1	4	1	4	2	7	0	0	2	0	1	8	5	11	5	2	16	7	10	13	7	3	23	1	30.4348	56.5217	30.4348	13.0435
12	70	11	7	0	5	0	9	0	0	2	5	1	1	5	1	8	16	6	15	7	9	21	16	13	24	14	15	37	1	43.2432	64.8649	37.8378	40.5405
12	71	11	7	0	2	5	9	1	1	2	4	1	0	1	0	15	22	3	13	8	17	16	25	11	30	17	16	41	1	60.9756	73.1707	41.4634	39.0244
12	72	11	7	0	12	3	6	2	4	0	1	4	1	8	1	10	18	17	8	11	16	25	27	28	24	23	20	52	1	51.9231	46.1538	44.2308	38.4615
12	73	11	7	0	13	1	6	2	3	3	1	4	0	7	1	13	15	16	8	11	19	24	30	27	27	22	21	54	1	55.5556	50	40.7407	38.8889
